# Supplementary material for: Evolution and Evaluation of Aesthetic Properties in Weathering Steel Accelerated Patinas: The Role of Lepidocrocite
Source: MDPI journal article supplement (doi:10.3390/met12060977), 2022-06-07
Supplement: s1 [file s1]

## Supplementary Materials

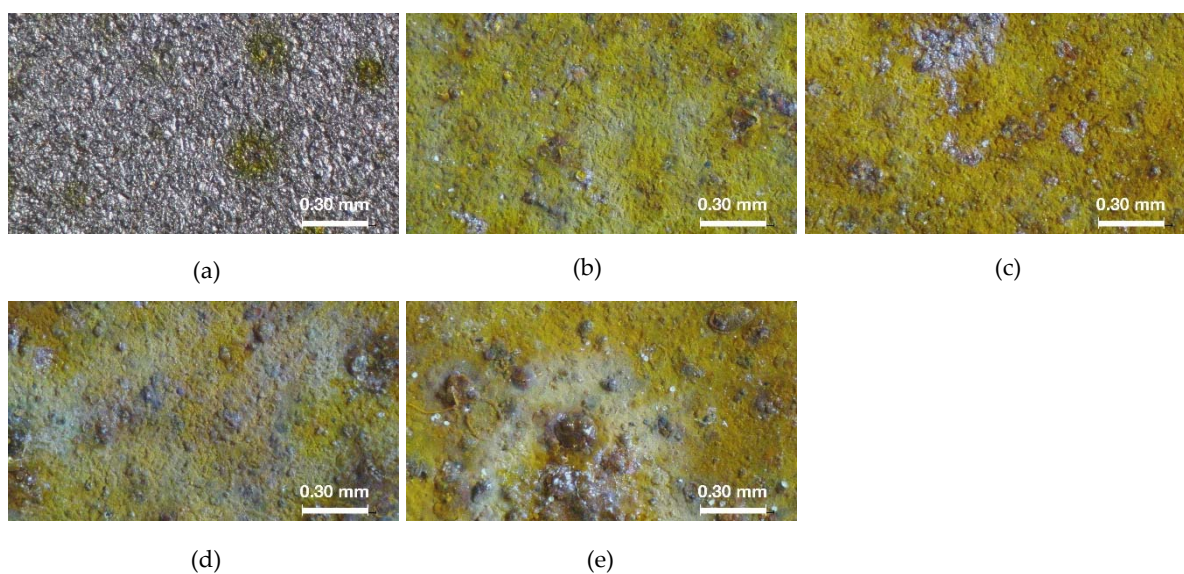

**Figure S1.** Optical microscope images of  $\text{H}_2\text{O}_2$  patina at different exposure times: (a) zero time; (b) 3 months; (c) 6 months; (d) 12 months and (e) 24 months.

**Table S1.** Evolution of Lab values with 95% confidence interval as time passes for the  $\text{H}_2\text{O}_2$  patina.

| Time      | L*   | L* error | a*   | a* error | b*   | b* error |
|-----------|------|----------|------|----------|------|----------|
| Zero      | 52   | 1        | 2.2  | 0.5      | 13   | 2        |
| 3 months  | 33.5 | 0.4      | 15.6 | 0.2      | 24.4 | 0.4      |
| 6 months  | 30.2 | 0.5      | 17.4 | 0.4      | 23.4 | 0.9      |
| 12 months | 33.6 | 0.4      | 15.4 | 0.3      | 20.1 | 0.4      |
| 24 months | 33.5 | 0.7      | 15.5 | 0.3      | 19.5 | 0.7      |

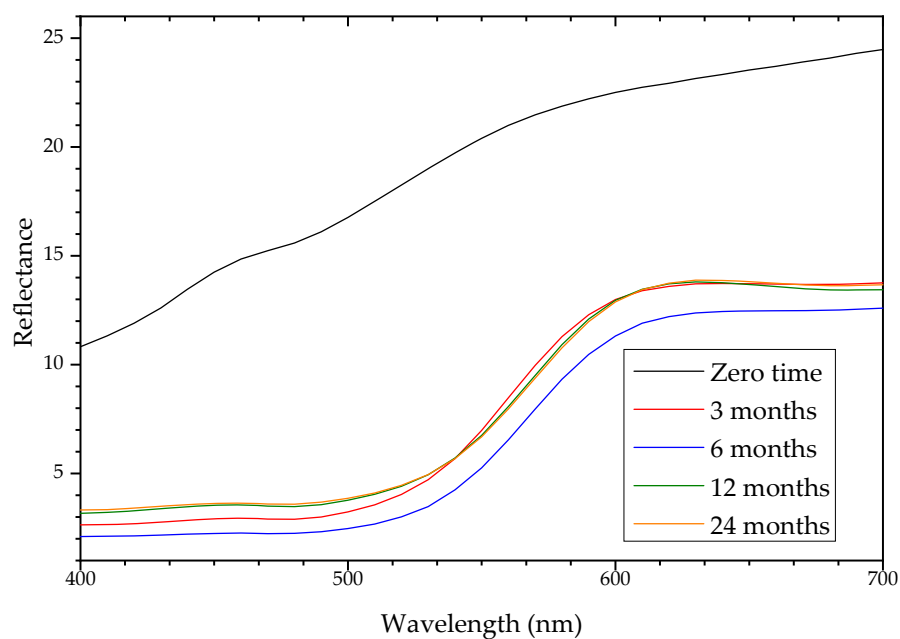

**Figure S2.** Reflectance spectrum of  $\text{H}_2\text{O}_2$  patina at different exposure times.

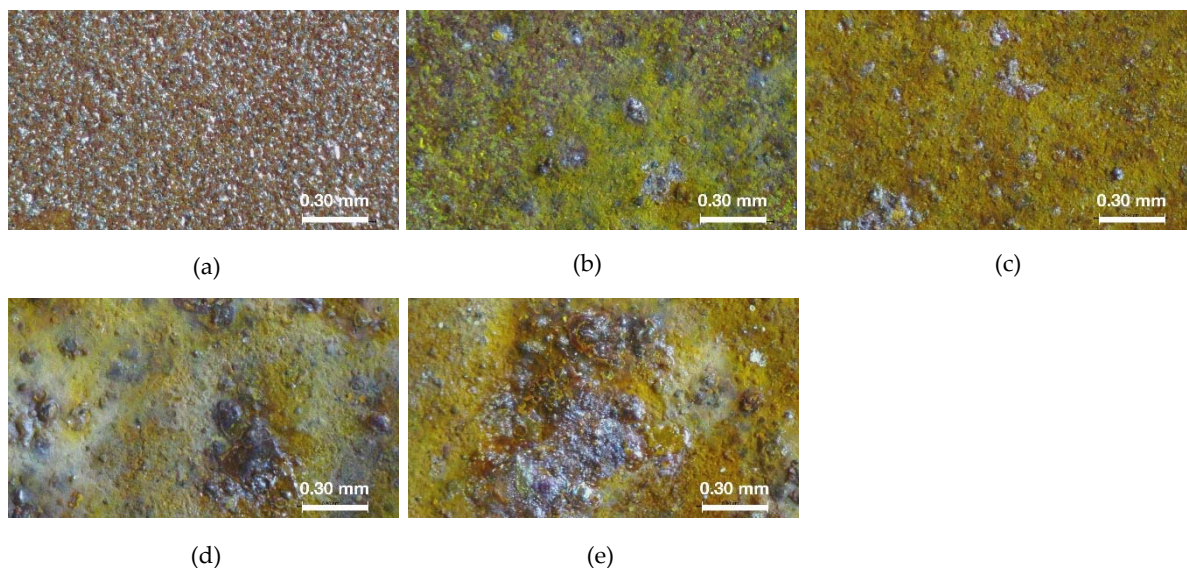

**Figure S3.** Optical microscope images of  $\text{CH}_3\text{COOH}$  patina at different exposure times: (a) zero time; (b) 3 months; (c) 6 months; (d) 12 months and (e) 24 months.

**Table S2.** Evolution of Lab values with 95% confidence interval as time passes for the  $\text{CH}_3\text{COOH}$  patina.

| Time      | L*   | L* error | a*   | a* error | b*   | b* error |
|-----------|------|----------|------|----------|------|----------|
| Zero      | 43   | 2        | 8.4  | 0.9      | 11.2 | 0.7      |
| 3 months  | 30.3 | 0.8      | 14.4 | 0.5      | 20   | 1        |
| 6 months  | 28.5 | 0.5      | 16.8 | 0.3      | 22.9 | 0.6      |
| 12 months | 32.9 | 0.8      | 15.2 | 0.3      | 20.1 | 0.6      |
| 24 months | 32.3 | 0.4      | 16.3 | 0.3      | 20.5 | 0.6      |

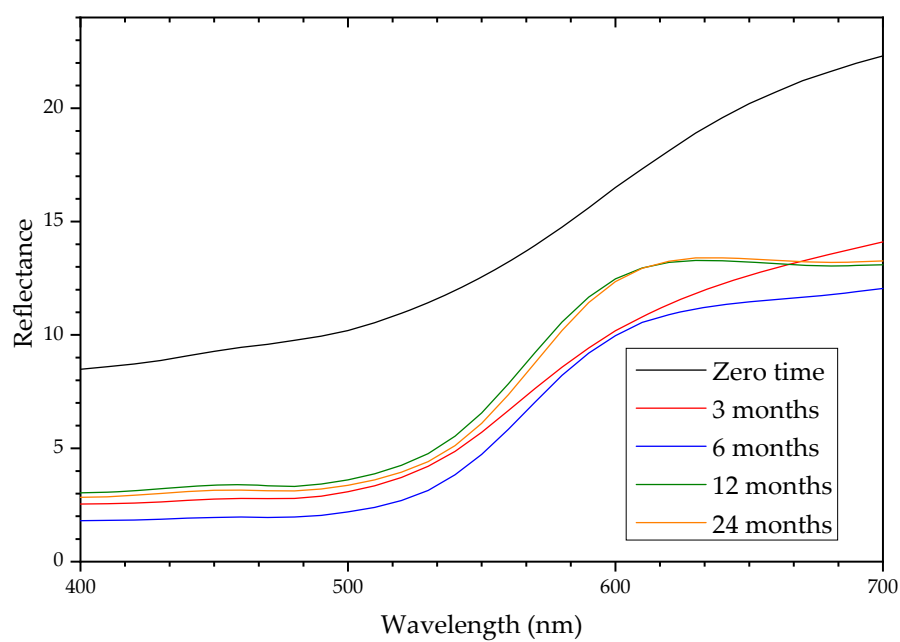

**Figure S4.** Reflectance spectrum of  $\text{CH}_3\text{COOH}$  patina at different exposure times.

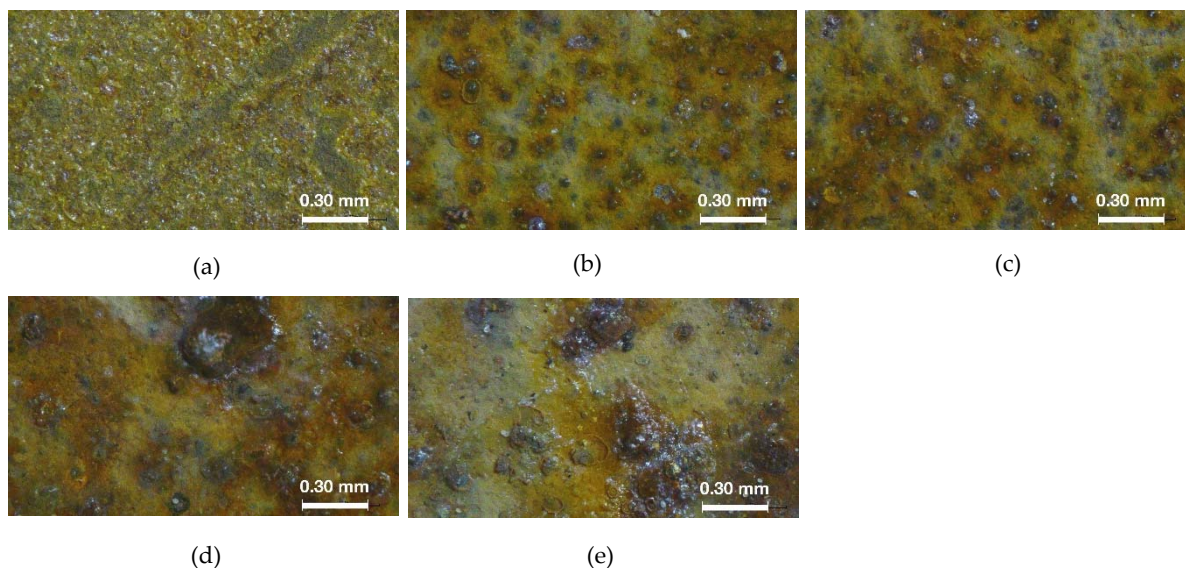

**Figure S5.** Optical microscope images of  $\text{H}_2\text{SO}_4$  patina at different exposure times: (a) zero time; (b) 3 months; (c) 6 months; (d) 12 months and (e) 24 months.

**Table S3.** Evolution of Lab values with 95% confidence interval as time passes for the  $\text{H}_2\text{SO}_4$  patina.

| Time      | L*   | L* error | a*   | a* error | b*   | b* error |
|-----------|------|----------|------|----------|------|----------|
| Zero      | 36   | 1        | 12.6 | 0.5      | 20.8 | 0.9      |
| 3 months  | 34.6 | 0.5      | 16.7 | 0.5      | 24.7 | 0.6      |
| 6 months  | 33.6 | 0.6      | 17.0 | 0.5      | 24.2 | 0.7      |
| 12 months | 32.3 | 0.6      | 15.8 | 0.3      | 18.5 | 0.5      |
| 24 months | 34.1 | 0.6      | 15.4 | 0.4      | 19.2 | 0.7      |

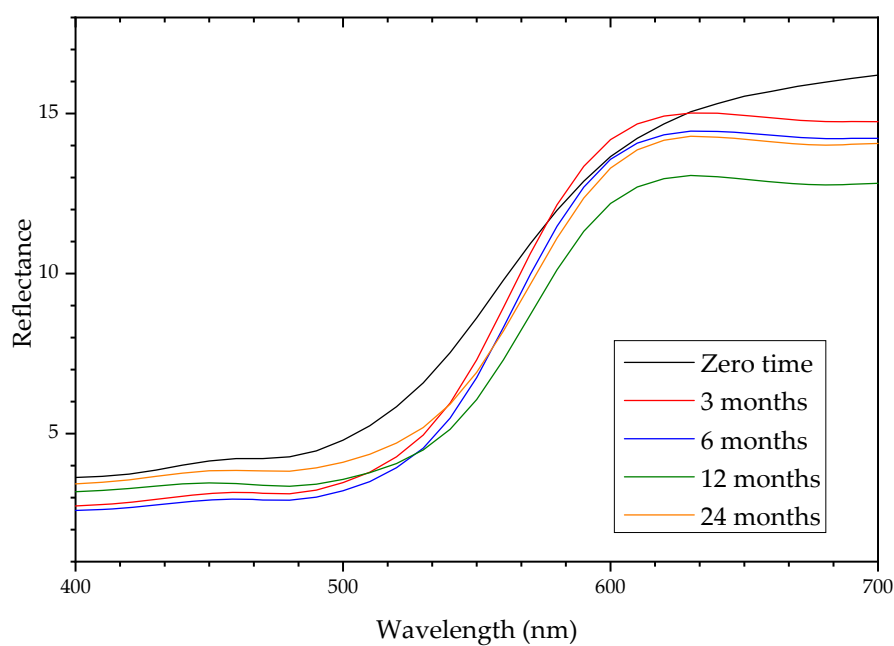

**Figure S6.** Reflectance spectrum of  $\text{H}_2\text{SO}_4$  patina at different exposure times.



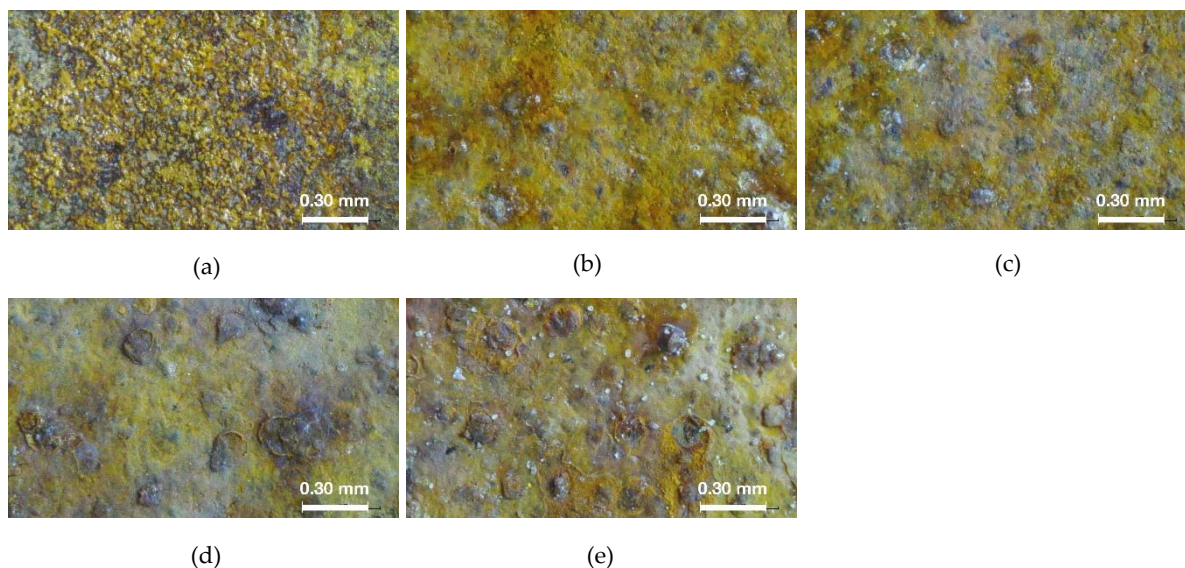

**Figure S7.** Optical microscope images of  $\text{NaHSO}_3$  patina at different exposure times: (a) zero time; (b) 3 months; (c) 6 months; (d) 12 months and (e) 24 months.

**Table S4.** Evolution of Lab values with 95% confidence interval as time passes for the  $\text{NaHSO}_3$  patina.

| Time      | L*   | L* error | a*   | a* error | b*   | b* error |
|-----------|------|----------|------|----------|------|----------|
| Zero      | 35.2 | 0.6      | 17   | 1        | 23   | 1        |
| 3 months  | 32.6 | 0.5      | 16.2 | 0.3      | 22.5 | 0.5      |
| 6 months  | 32.1 | 0.5      | 16.7 | 0.3      | 23.1 | 0.4      |
| 12 months | 33.2 | 0.6      | 15.3 | 0.3      | 18.6 | 0.5      |
| 24 months | 33.8 | 0.6      | 14.6 | 0.5      | 18.3 | 0.7      |

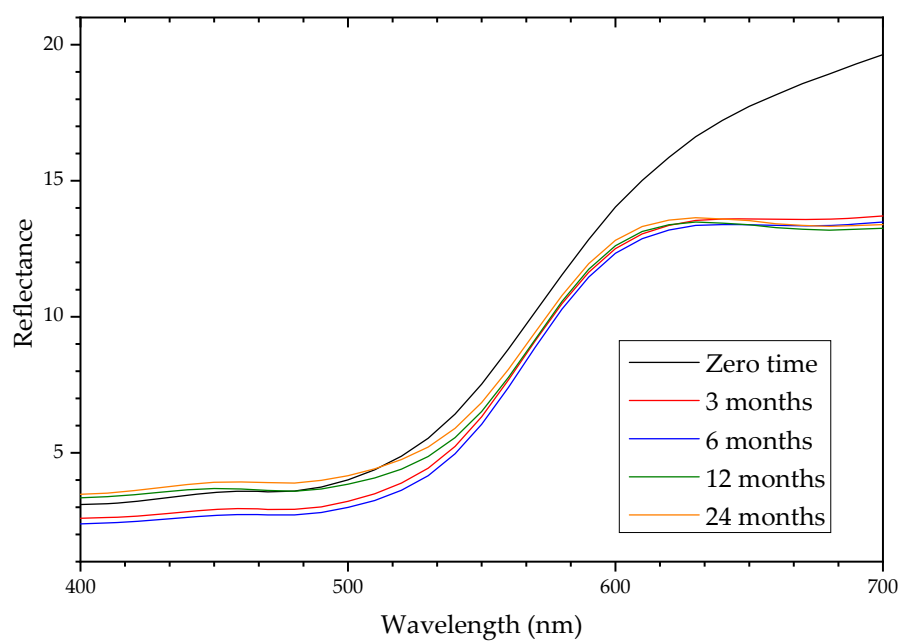

**Figure S8.** Reflectance spectrum of  $\text{NaHSO}_3$  patina at different exposure times.

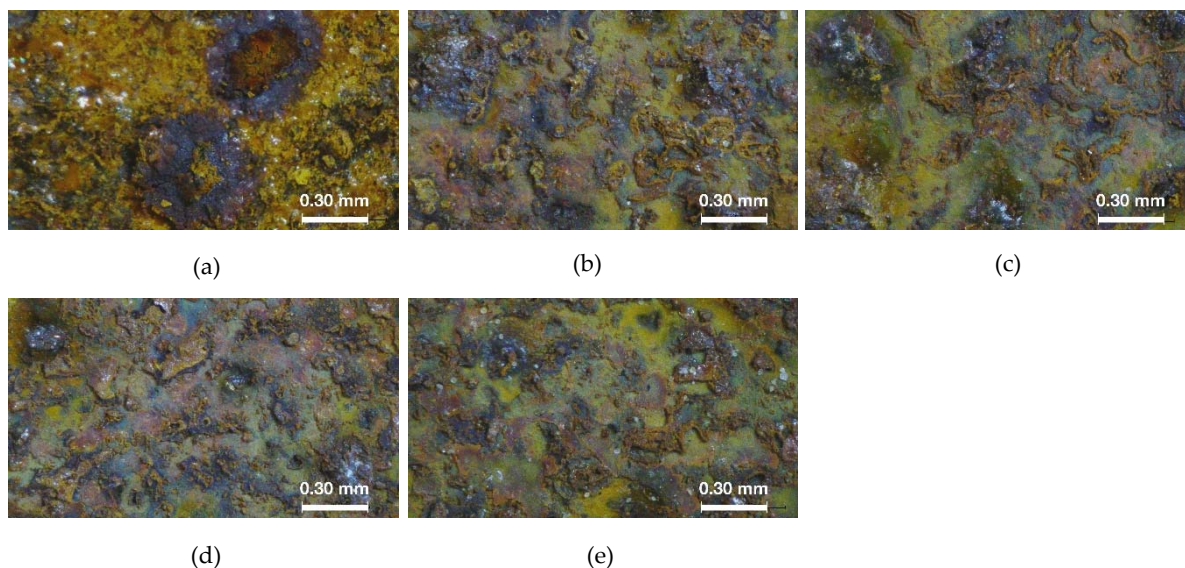

**Figure S9.** Optical microscope images of FeCl<sub>3</sub> patina at different exposure times: (a) zero time (i.e. prior to atmospheric exposure); (b) 3 months; (c) 6 months; (d) 12 months and (e) 24 months.

**Table S5.** Evolution of Lab values with 95% confidence interval as time passes for the FeCl<sub>3</sub> patina.

| Time      | L*   | L* error | a*   | a* error | b*   | b* error |
|-----------|------|----------|------|----------|------|----------|
| Zero      | 32.0 | 0.6      | 14.9 | 0.4      | 19.3 | 0.7      |
| 3 months  | 33.6 | 0.4      | 12.6 | 0.4      | 13.7 | 0.5      |
| 6 months  | 33.9 | 0.3      | 11.4 | 0.5      | 14.0 | 0.5      |
| 12 months | 31.5 | 0.4      | 12.6 | 0.4      | 13.9 | 0.5      |
| 24 months | 31.7 | 0.8      | 13.9 | 0.6      | 17.4 | 0.5      |

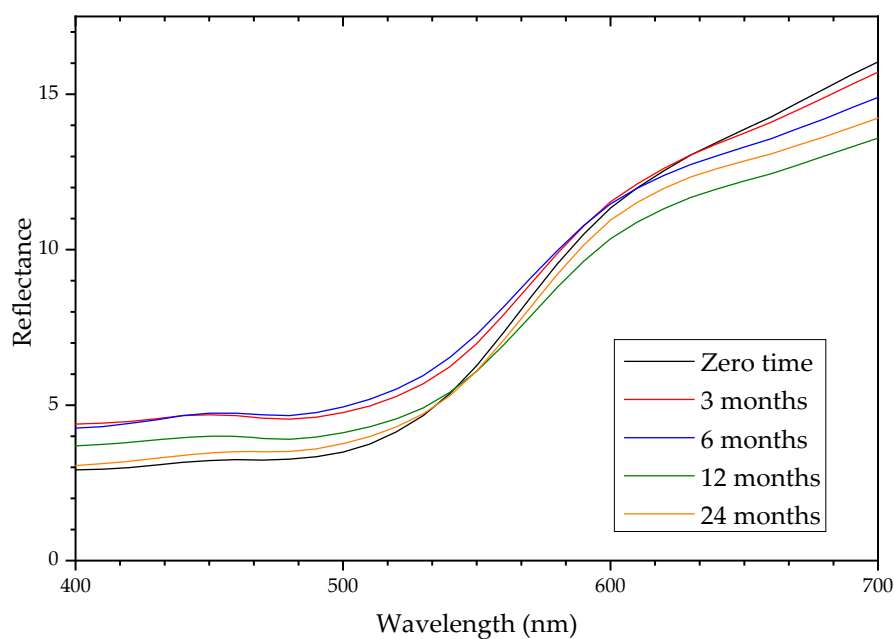

**Figure S10.** Reflectance spectrum of FeCl<sub>3</sub> patina at different exposure times.

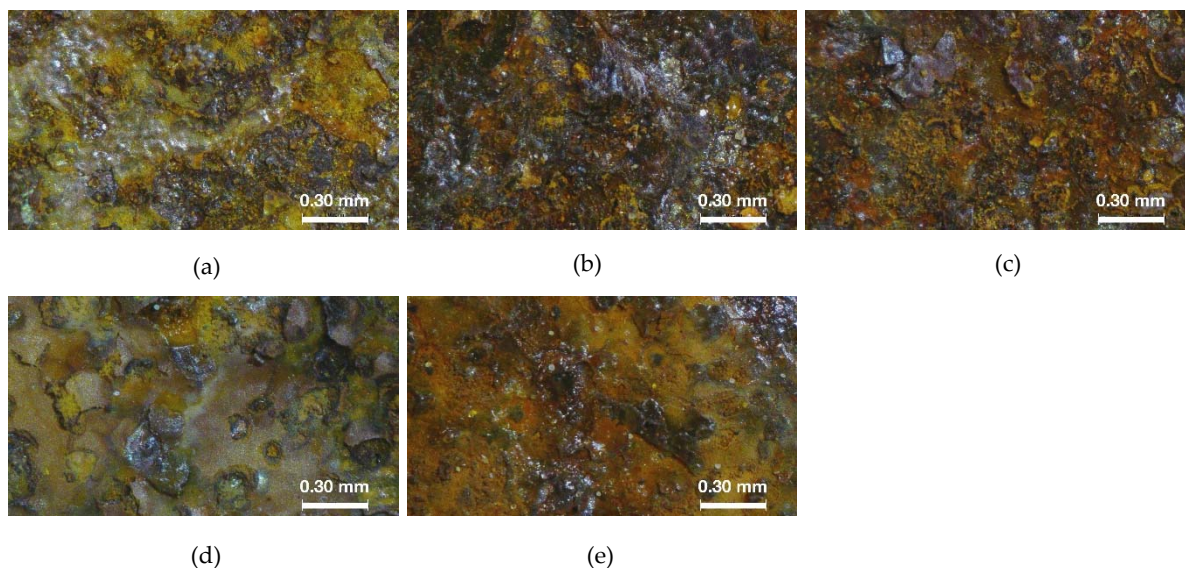

**Figure S11.** Optical microscope images of  $\text{Fe}(\text{NO}_3)_3$  patina at different exposure times: (a) zero time; (b) 3 months; (c) 6 months; (d) 12 months and (e) 24 months.

**Table S6.** Evolution of Lab values with 95% confidence interval as time passes for the  $\text{Fe}(\text{NO}_3)_3$  patina.

| Time      | L*   | L* error | a*   | a* error | b*   | b* error |
|-----------|------|----------|------|----------|------|----------|
| Zero      | 31   | 1        | 14.5 | 0.7      | 19.7 | 0.8      |
| 3 months  | 33.4 | 0.8      | 13   | 1        | 16   | 1        |
| 6 months  | 29.1 | 0.7      | 13.1 | 0.6      | 14   | 1        |
| 12 months | 30.0 | 0.7      | 12.9 | 0.5      | 16.0 | 0.7      |
| 24 months | 30.1 | 0.8      | 12.1 | 0.6      | 14.8 | 0.9      |

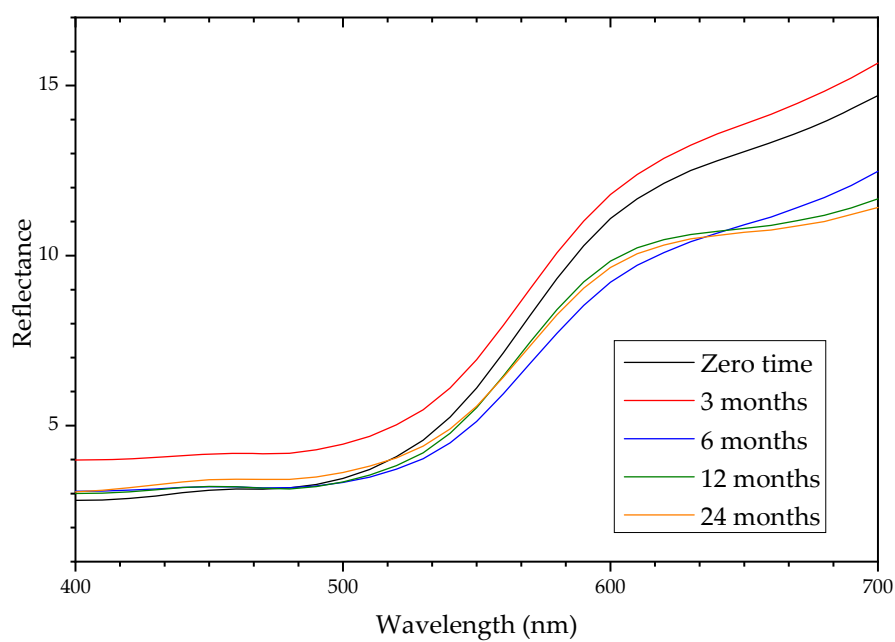

**Figure S12.** Reflectance spectrum of  $\text{Fe}(\text{NO}_3)_3$  patina at different exposure times.

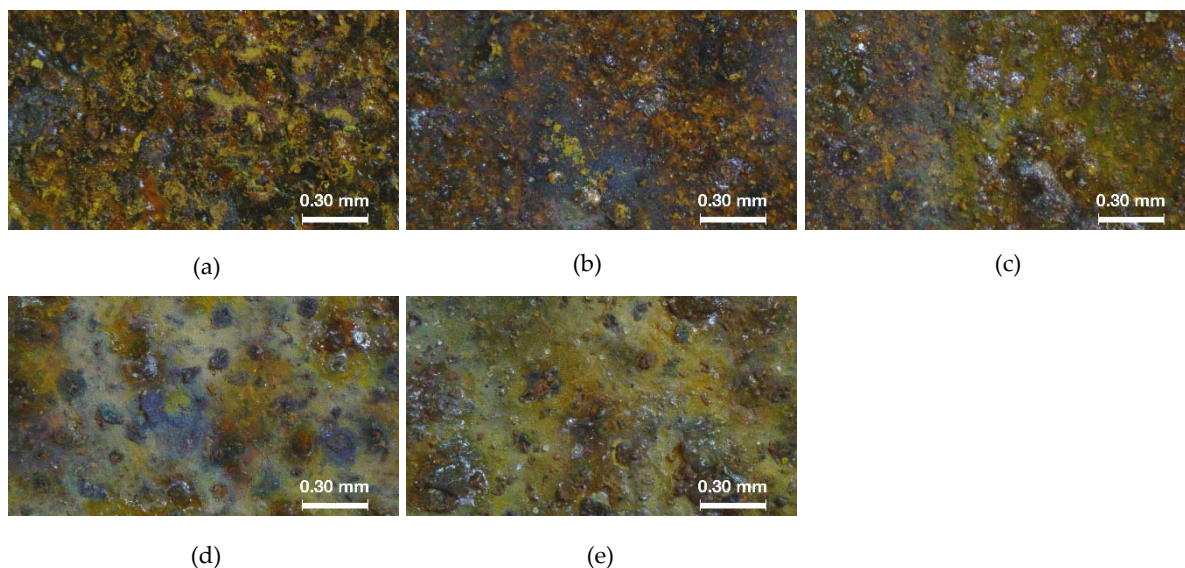

**Figure S13.** Optical microscope images of HCl patina at different exposure times: (a) zero time; (b) 3 months; (c) 6 months; (d) 12 months and (e) 24 months.

**Table S7.** Evolution of Lab values with 95% confidence interval as time passes for the HCl patina.

| Time      | L*   | L* error | a*   | a* error | b*   | b* error |
|-----------|------|----------|------|----------|------|----------|
| Zero      | 25.8 | 0.5      | 13.2 | 0.6      | 14.6 | 0.5      |
| 3 months  | 28.2 | 0.7      | 11.0 | 0.7      | 10.4 | 0.8      |
| 6 months  | 28.5 | 0.4      | 10.4 | 0.5      | 10.1 | 0.7      |
| 12 months | 33.7 | 0.9      | 11.0 | 0.5      | 15.2 | 0.9      |
| 24 months | 33.4 | 0.7      | 11.8 | 0.7      | 17.3 | 0.9      |

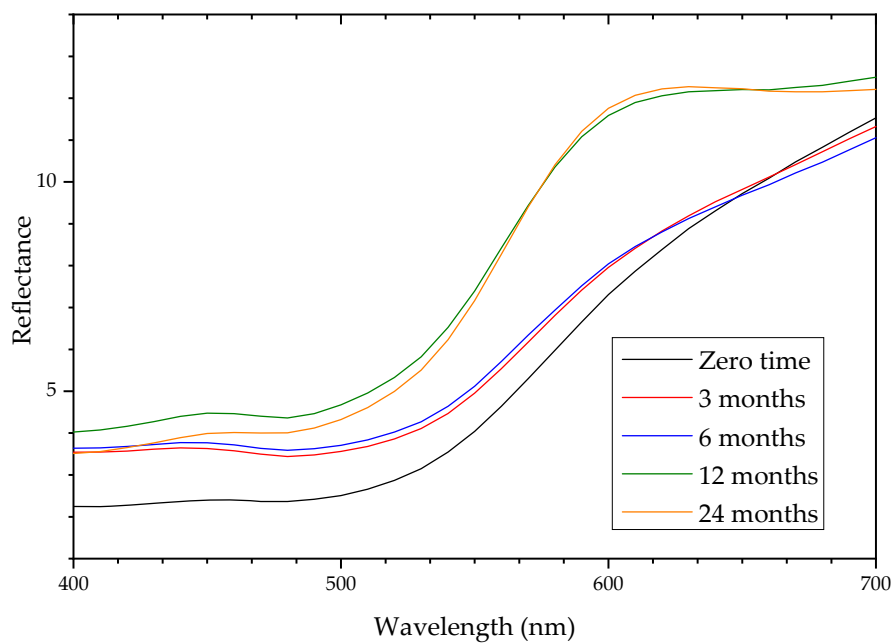

**Figure S14.** Reflectance spectrum of HCl patina at different exposure times.



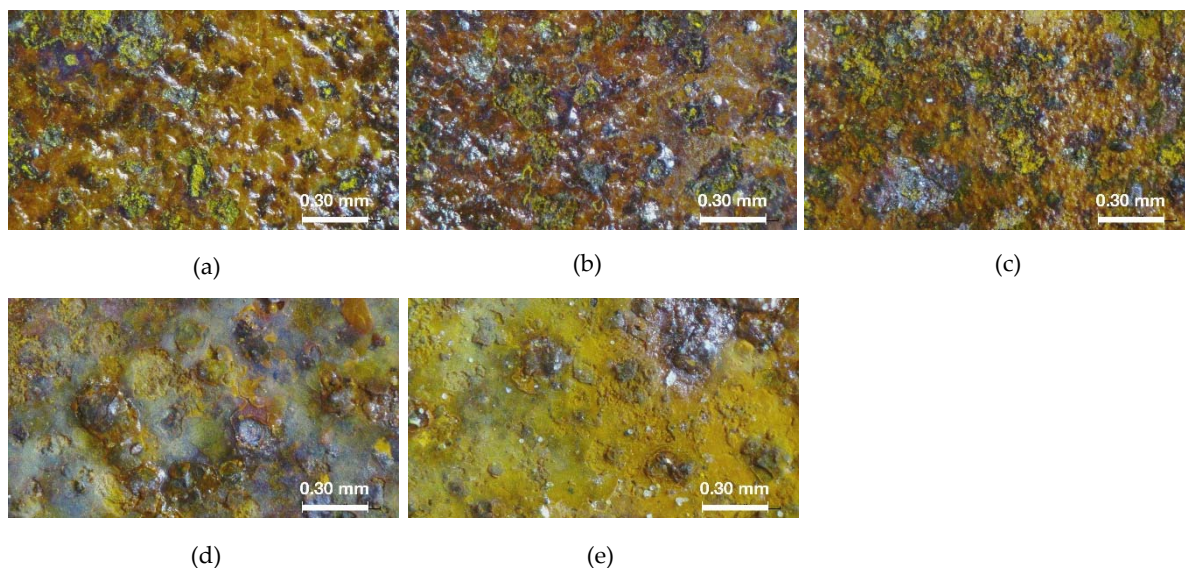

**Figure S15.** Optical microscope images of HNO<sub>3</sub> patina at different exposure times: (a) zero time; (b) 3 months; (c) 6 months; (d) 12 months and (e) 24 months.

**Table S8.** Evolution of Lab values with 95% confidence interval as time passes for the HNO<sub>3</sub> patina.

| Time      | L*   | L* error | a*   | a* error | b*   | b* error |
|-----------|------|----------|------|----------|------|----------|
| Zero      | 34   | 1        | 14.8 | 0.8      | 15   | 1        |
| 3 months  | 32.5 | 0.9      | 13.6 | 0.6      | 12.0 | 0.8      |
| 6 months  | 29.1 | 0.7      | 15   | 1        | 14   | 1        |
| 12 months | 30.5 | 0.8      | 12.3 | 0.5      | 15.8 | 0.8      |
| 24 months | 32.0 | 0.9      | 14.2 | 0.5      | 17.9 | 0.8      |

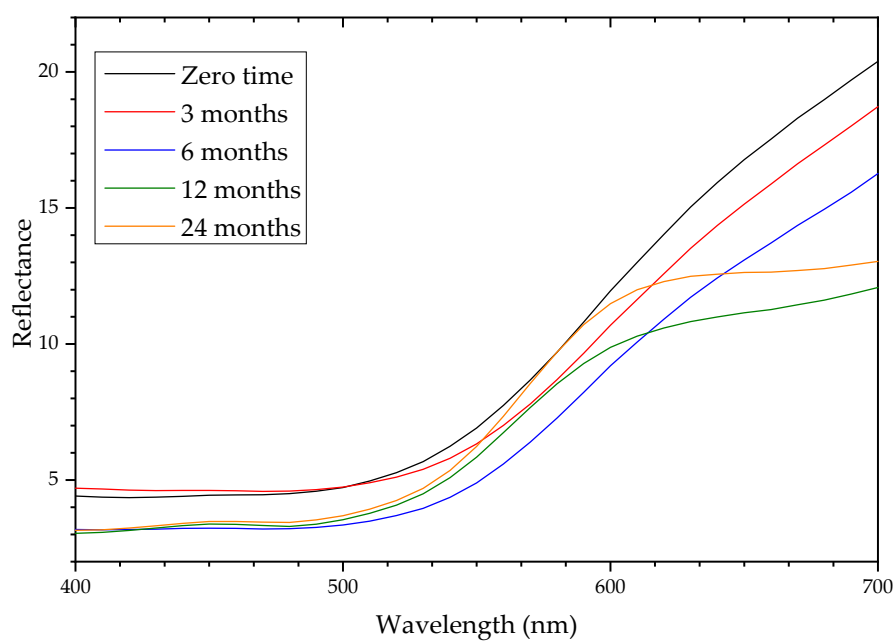

**Figure S16.** Reflectance spectrum of HNO<sub>3</sub> patina at different exposure times.



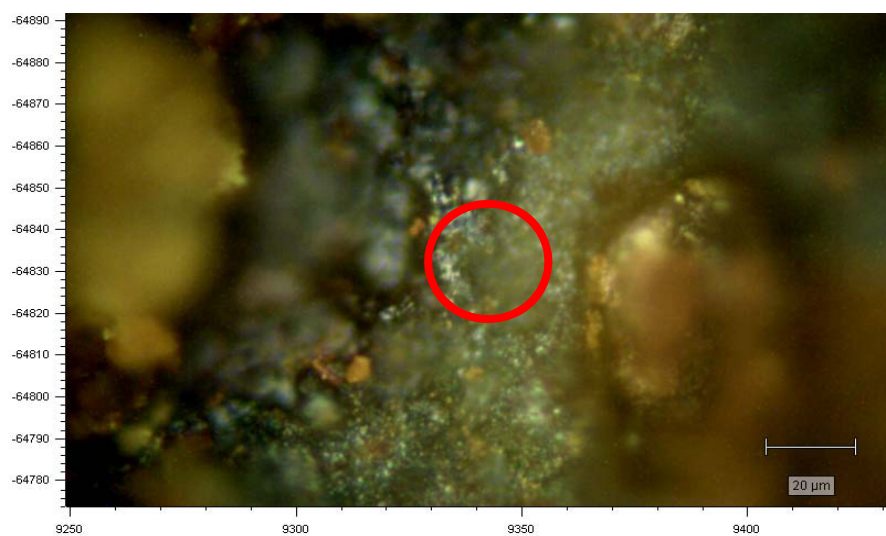

(a)

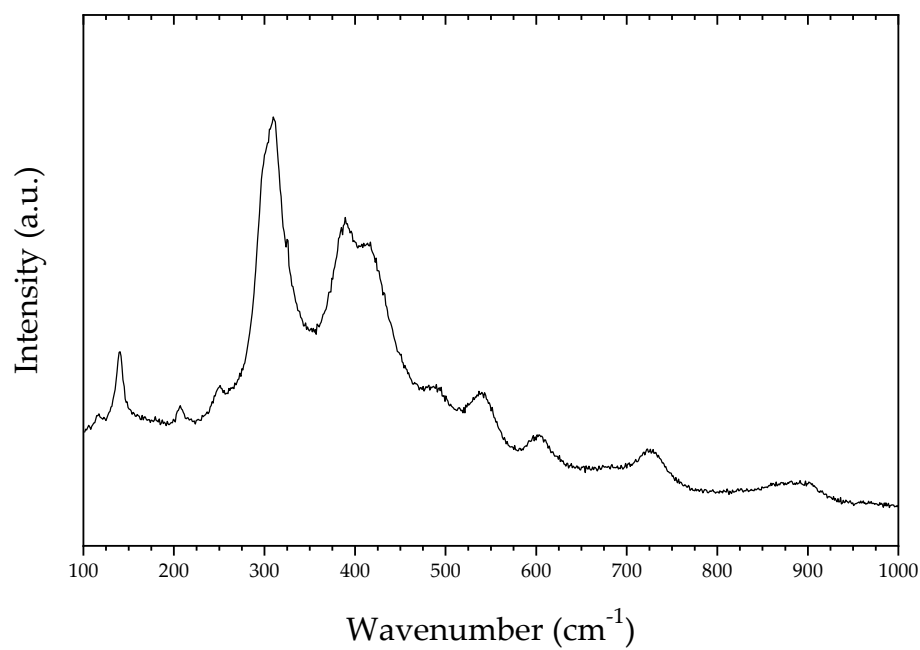

(b)

**Figure S17.** Akanageite section of the accelerated patina developed with  $\text{FeCl}_3$  at zero time i.e. prior to atmospheric exposure (a) optical microscope image (b) Raman spectrum of the selected area.

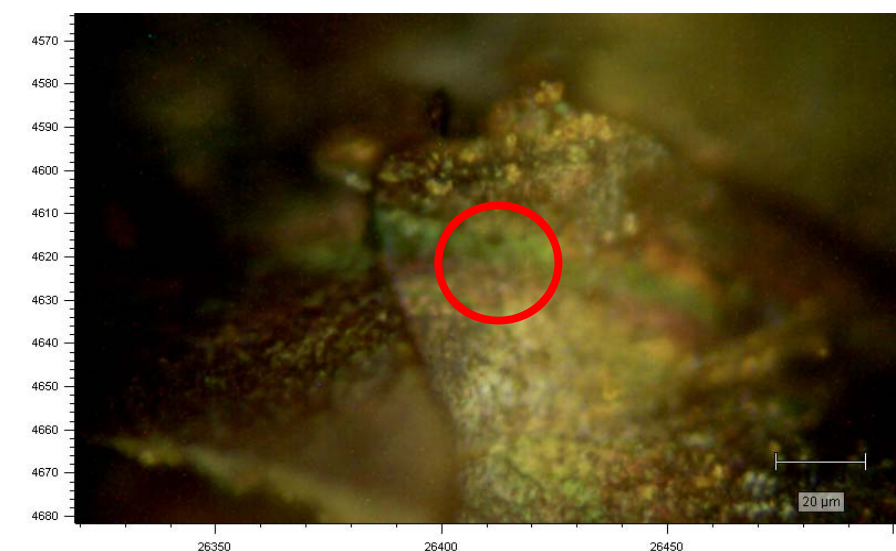

(a)

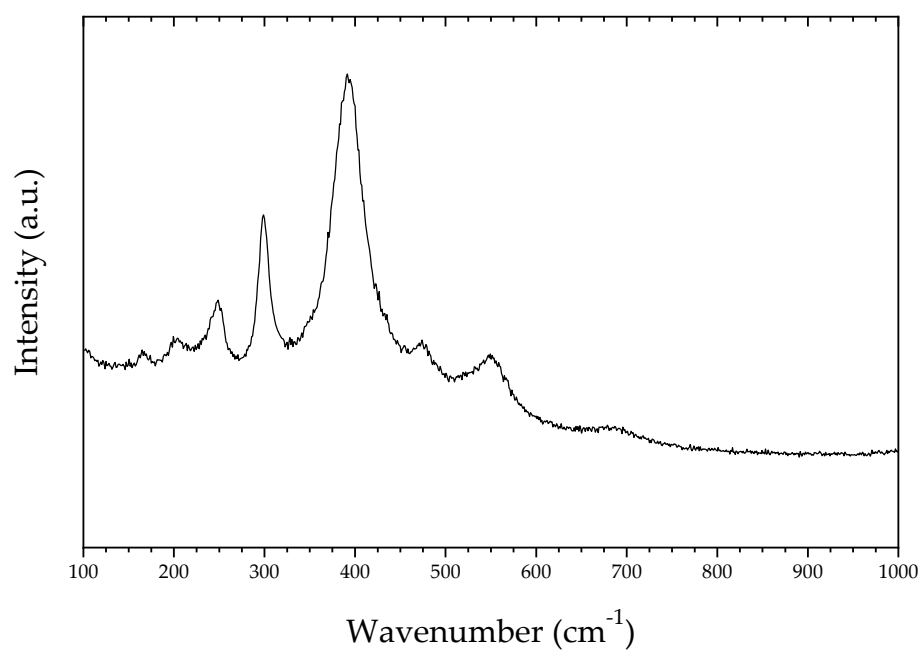

(b)

**Figure S18.** Goethite section of the accelerated patina developed with  $\text{Fe}(\text{NO}_3)_3$  at zero time i.e. prior to atmospheric exposure (a) optical microscope image (b) Raman spectrum of the selected area.

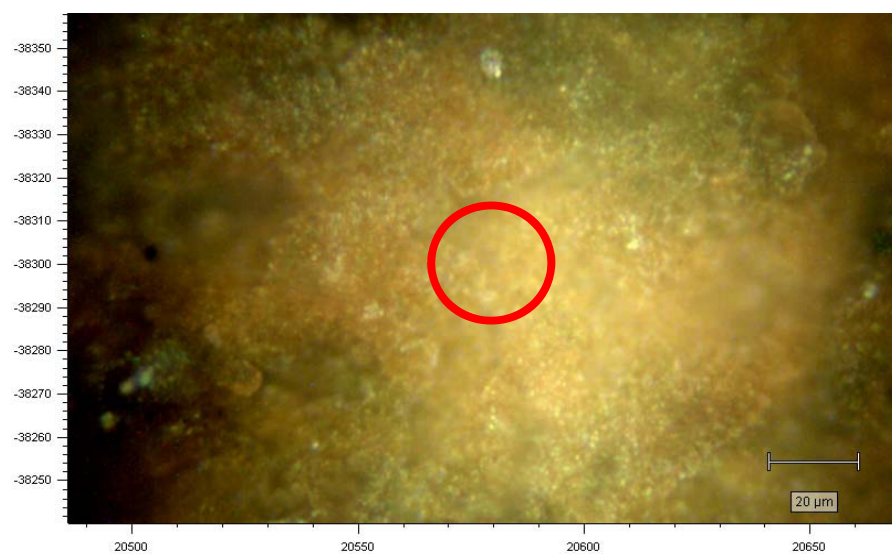

(a)

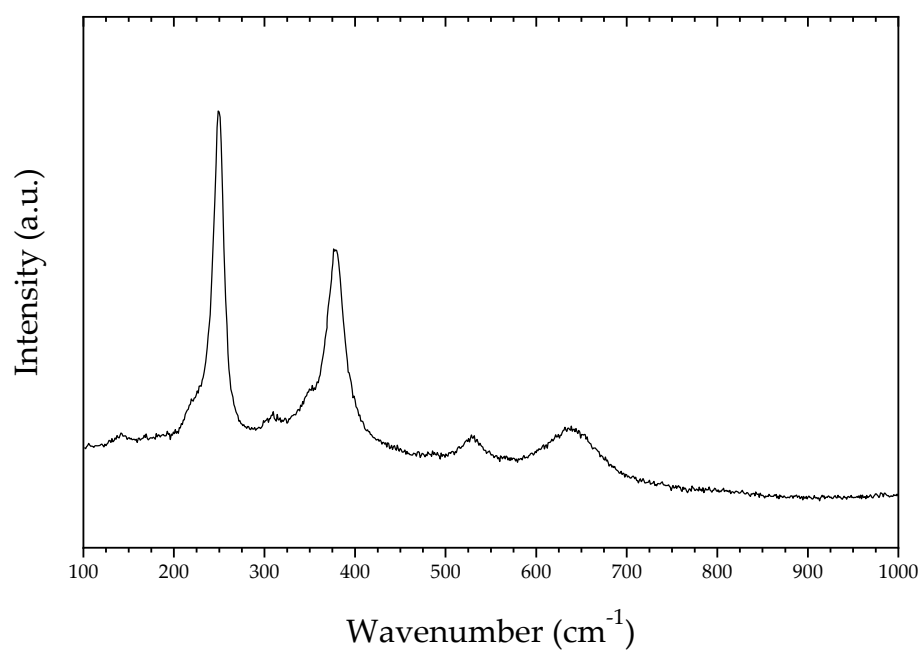

(b)

**Figure S19.** Light lepidocrocite section of the accelerated patina developed with H<sub>2</sub>SO<sub>4</sub> after 3 months of atmospheric exposure (a) optical microscope image (b) Raman spectrum of the selected area.



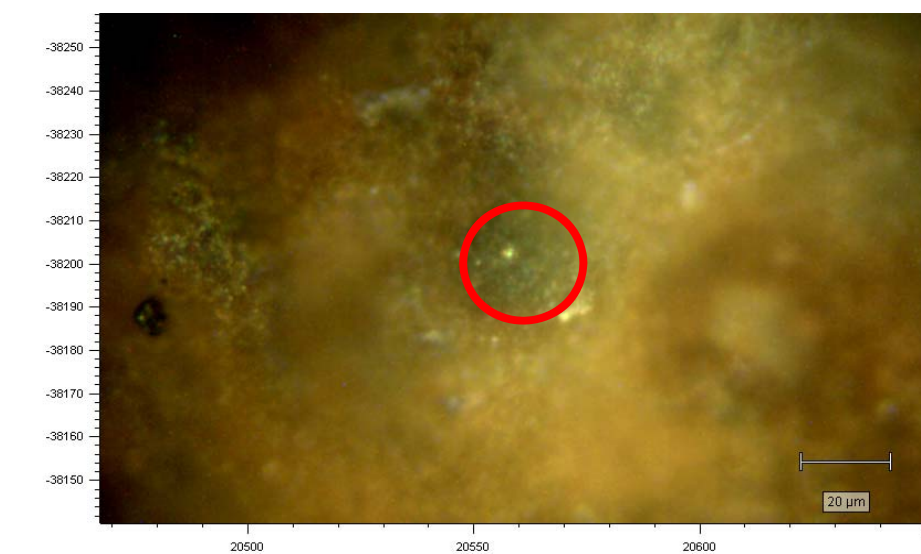

(a)

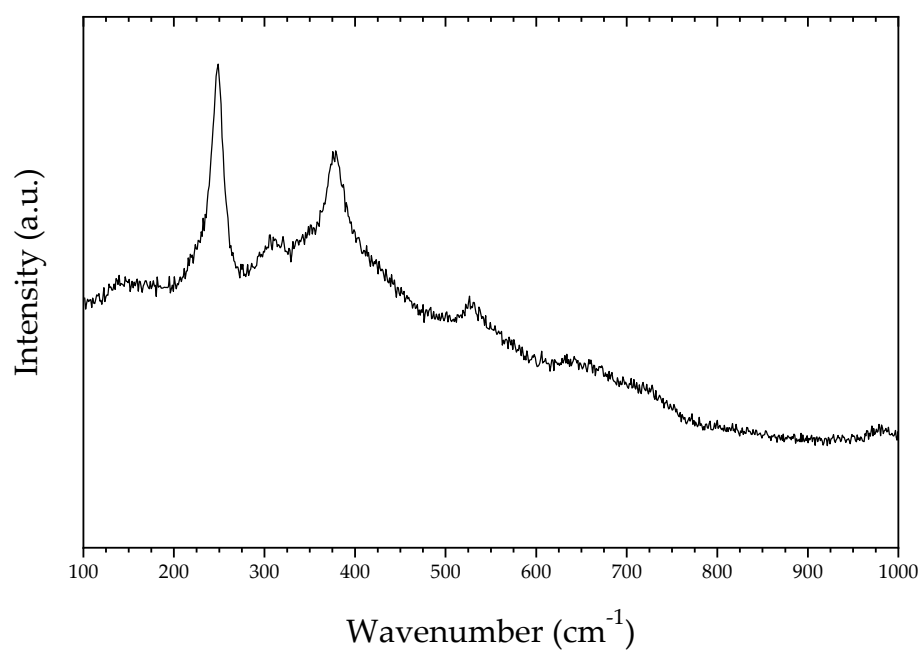

(b)

**Figure S20.** Dark lepidocrocite section of the accelerated patina developed with H<sub>2</sub>SO<sub>4</sub> after 3 months of atmospheric exposure (a) optical microscope image (b) Raman spectrum of the selected area.

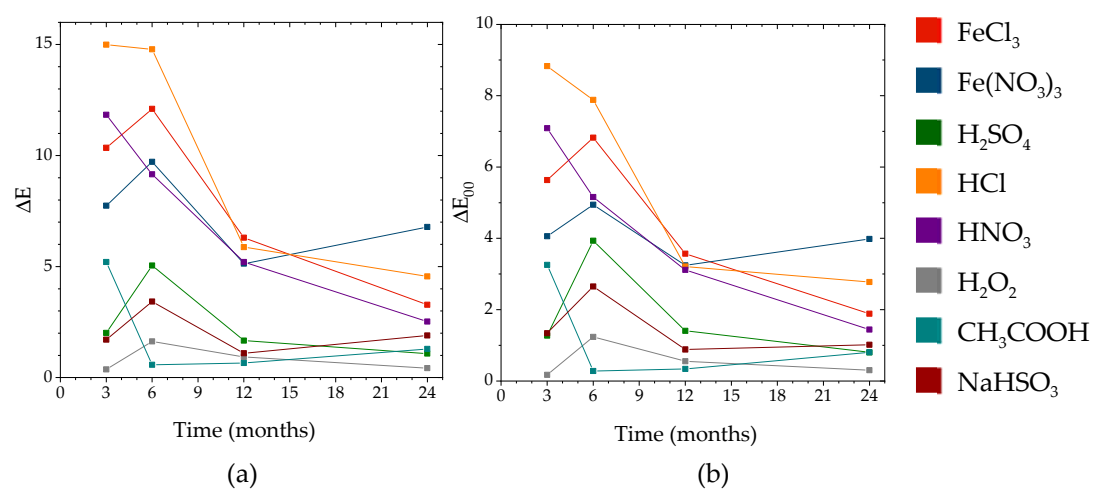

**Figure S21.** (a)  $\Delta E$  and (b)  $\Delta E_{00}$  values comparing natural patina with accelerated patinas over time for 24-month period of atmospheric exposure.
